# Supplementary material for: AC conductivity study of mechanochemically synthesized solid electrolytes of Li6−aMa/nnPS5Cl (M = Ca, Mg, Ba, Zn, Al, Y)
Source: Royal Society of Chemistry journal article supplement (doi:10.1039/d4ra02621g), 2024-01-01
Supplement: d4ra02621g1.pdf [file d4ra02621g1.pdf]

*Supporting Information*

**AC Conductivity Study of Mechanochemical Synthesized Solid Electrolytes of**

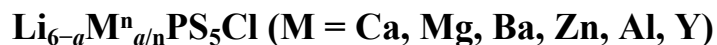

Tran Viet Toan<sup>1,2</sup>, Luu Tuan Anh<sup>1,2</sup>, Nguyen Thi Minh Nguyet<sup>2,3</sup>, Tran Anh Tu<sup>1,2,4</sup>, Nguyen Huu Huy Phuc<sup>1,2,4\*</sup>

<sup>1</sup>Faculty of Materials Technology, Ho Chi Minh City University of Technology (HCMUT), 268 Ly Thuong Kiet Str., Dist. 10, Ho Chi Minh City, Vietnam

<sup>2</sup>Vietnam National University Ho Chi Minh City, Linh Trung Ward, Thu Duc Dist., Ho Chi Minh City, Vietnam

<sup>3</sup>VNU-HCM Key Laboratory for Material Technologies, Ho Chi Minh City University of Technology (HCMUT), 268 Ly Thuong Kiet Str., Dist. 10, Ho Chi Minh City, Vietnam

<sup>4</sup>National Key Laboratory of Polymer and Composite Materials– Ho Chi Minh City, 268 Ly Thuong Kiet, District 10, Ho Chi Minh City, Vietnam

\*Corresponding author: [nhhphuc@hcmut.edu.vn](mailto:nhhphuc@hcmut.edu.vn) (NHH. Phuc)

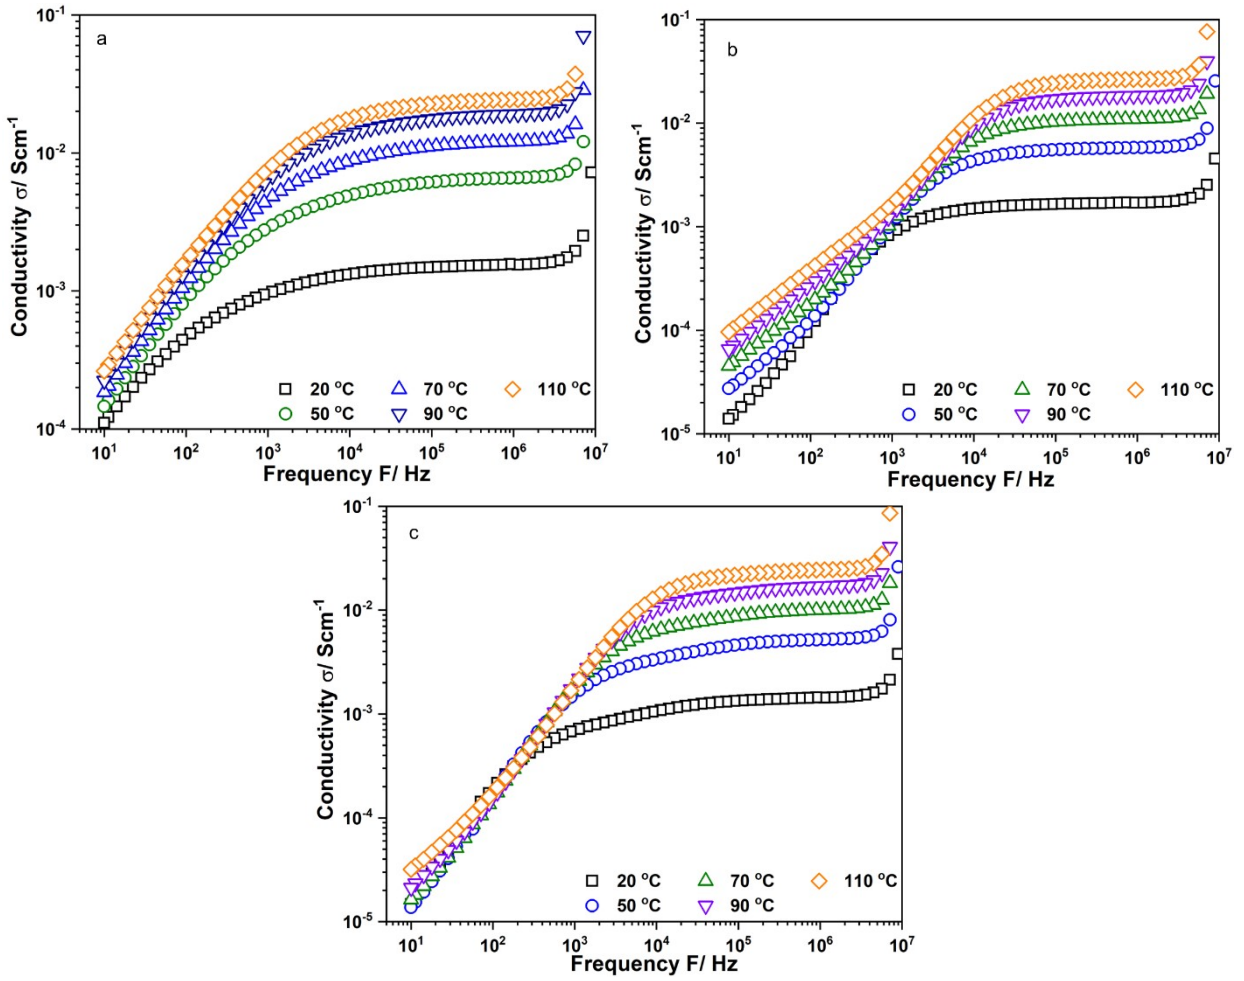

Figure S1: Conductivity isotherms of (a)  $\text{Li}_{5.96}\text{Ca}_{0.002}\text{PS}_5\text{Cl}$ ; (b)  $\text{Li}_{5.9}\text{Ca}_{0.05}\text{PS}_5\text{Cl}$  and (c)  $\text{Li}_{5.8}\text{Ca}_{0.1}\text{PS}_5\text{Cl}$  measured from 10 Hz to 9 MHz.

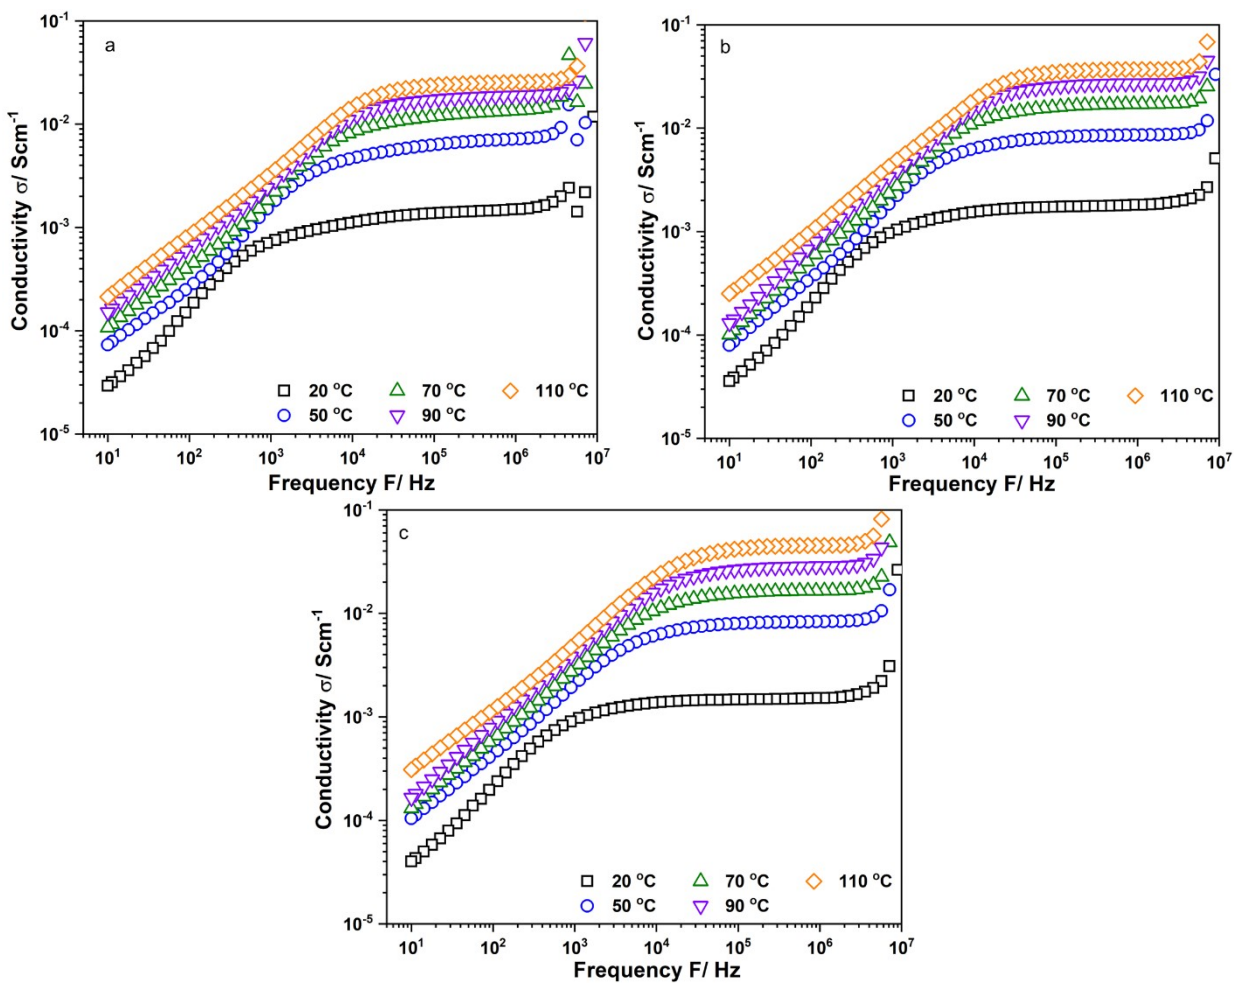

Figure S2: Conductivity isotherms of (a)  $\text{Li}_{5.94}\text{Ba}_{0.03}\text{PS}_5\text{Cl}$ ; (b)  $\text{Li}_{5.94}\text{Zn}_{0.03}\text{PS}_5\text{Cl}$  and (c)  $\text{Li}_{5.94}\text{Y}_{0.02}\text{PS}_5\text{Cl}$  measured from 10 Hz to 9 MHz.

Table S1: The values of A and n in  $\sigma = \sigma_{DC} + A\omega^n$

|                                                           | A                     |                       |                       |                       |                       | n      |        |        |        |        |
|-----------------------------------------------------------|-----------------------|-----------------------|-----------------------|-----------------------|-----------------------|--------|--------|--------|--------|--------|
|                                                           | 20 °C                 | 50 °C                 | 70 °C                 | 90 °C                 | 110 °C                | 20 °C  | 50 °C  | 70 °C  | 90 °C  | 110 °C |
| Li <sub>6</sub> PS <sub>5</sub> Cl                        | 9.41x10 <sup>-6</sup> | 8.26x10 <sup>-5</sup> | 5.54x10 <sup>-5</sup> | 3.63x10 <sup>-5</sup> | 4.92x10 <sup>-5</sup> | 0.241  | 0.1442 | 0.1594 | 0.2044 | 0.2122 |
| Li <sub>5.96</sub> Ca <sub>0.002</sub> PS <sub>5</sub> Cl | 7.03x10 <sup>-5</sup> | 2.22x10 <sup>-3</sup> | 3.39x10 <sup>-3</sup> | 4.59x10 <sup>-3</sup> | 3.73x10 <sup>-3</sup> | 0.106  | 0.045  | 0.0592 | 0.0571 | 0.0663 |
| Li <sub>5.94</sub> Ca <sub>0.03</sub> PS <sub>5</sub> Cl  | 3.77x10 <sup>-4</sup> | 2.56x10 <sup>-3</sup> | 3.98x10 <sup>-3</sup> | 3.40x10 <sup>-3</sup> | 5.35x10 <sup>-3</sup> | 0.0528 | 0.0394 | 0.0532 | 0.088  | 0.0543 |
| Li <sub>5.9</sub> Ca <sub>0.05</sub> PS <sub>5</sub> Cl   | 2.46x10 <sup>-4</sup> | 1.90x10 <sup>-3</sup> | 1.55x10 <sup>-3</sup> | 3.08x10 <sup>-3</sup> | 5.06x10 <sup>-3</sup> | 0.0478 | 0.0341 | 0.0913 | 0.0669 | 0.0629 |
| Li <sub>5.8</sub> Ca <sub>0.1</sub> PS <sub>5</sub> Cl    | 6.1x10 <sup>-5</sup>  | 8.64x10 <sup>-4</sup> | 1.10x10 <sup>-3</sup> | 2.08x10 <sup>-3</sup> | 1.54x10 <sup>-3</sup> | 0.105  | 0.0537 | 0.072  | 0.065  | 0.104  |
| Li <sub>5.94</sub> Ba <sub>0.03</sub> PS <sub>5</sub> Cl  | 1.90x10 <sup>-4</sup> | 1.19x10 <sup>-3</sup> | 2.00x10 <sup>-3</sup> | 4.12x10 <sup>-3</sup> | 6.33x10 <sup>-3</sup> | 0.0887 | 0.0914 | 0.1062 | 0.0711 | 0.0543 |
| Li <sub>5.94</sub> Zn <sub>0.03</sub> PS <sub>5</sub> Cl  | 4.86x10 <sup>-5</sup> | 2.06x10 <sup>-3</sup> | 3.95x10 <sup>-3</sup> | 6.74x10 <sup>-3</sup> | 5.84x10 <sup>-3</sup> | 0.1346 | 0.0405 | 0.0414 | 0.036  | 0.07   |
| Li <sub>5.94</sub> Mg <sub>0.03</sub> PS <sub>5</sub> Cl  | 3.91x10 <sup>-5</sup> | 1.4x10 <sup>-4</sup>  | 1.02x10 <sup>-4</sup> | 9.79x10 <sup>-4</sup> | 3.04x10 <sup>-3</sup> | 0.1109 | 0.1152 | 0.0699 | 0.1213 | 0.0895 |
| Li <sub>5.94</sub> Al <sub>0.02</sub> PS <sub>5</sub> Cl  | 1.43x10 <sup>-5</sup> | 1.65x10 <sup>-4</sup> | 6.25x10 <sup>-5</sup> | 2.12x10 <sup>-5</sup> | 1.40x10 <sup>-5</sup> | 0.1988 | 0.1425 | 0.234  | 0.3356 | 0.3868 |
| Li <sub>5.94</sub> Y <sub>0.02</sub> PS <sub>5</sub> Cl   | 1.13x10 <sup>-4</sup> | 1.83x10 <sup>-3</sup> | 4.34x10 <sup>-3</sup> | 8.68x10 <sup>-3</sup> | 1.55x10 <sup>-2</sup> | 0.0744 | 0.0434 | 0.0401 | 0.0371 | 0.0327 |

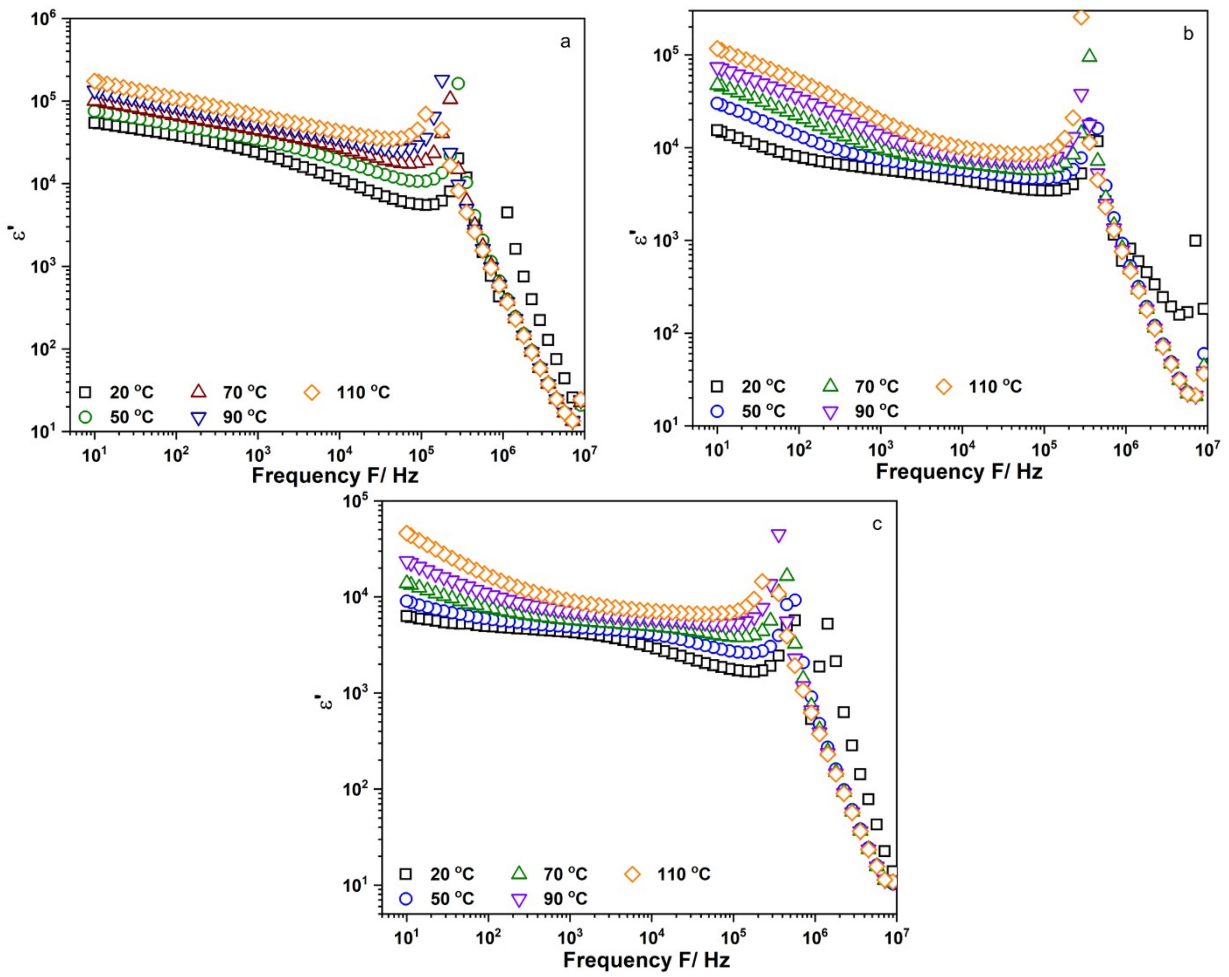

Figure S3: Frequency dependent of the real part of permittivity,  $\epsilon'$ , of (a)  $\text{Li}_{5.96}\text{Ca}_{0.002}\text{PS}_5\text{Cl}$ ; (b)  $\text{Li}_{5.9}\text{Ca}_{0.05}\text{PS}_5\text{Cl}$  and (c)  $\text{Li}_{5.8}\text{Ca}_{0.1}\text{PS}_5\text{Cl}$  measured from 10 Hz to 9 MHz.

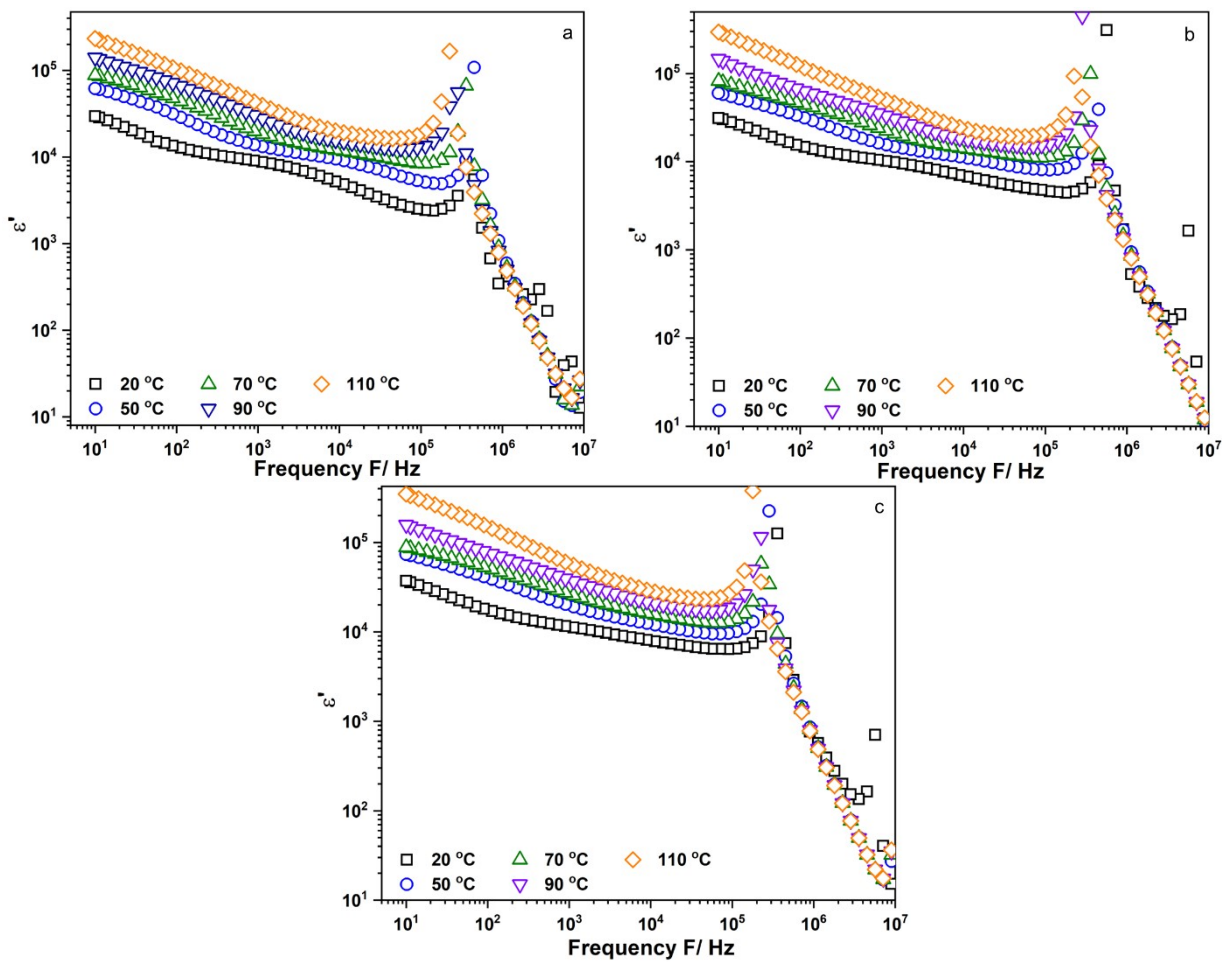

Figure S4: Frequency dependent of the real part of permittivity,  $\epsilon'$ , of (a)  $\text{Li}_{5.94}\text{Ba}_{0.03}\text{PS}_5\text{Cl}$ ; (b)  $\text{Li}_{5.94}\text{Zn}_{0.03}\text{PS}_5\text{Cl}$  and (c)  $\text{Li}_{5.94}\text{Y}_{0.02}\text{PS}_5\text{Cl}$  measured from 10 Hz to 9 MHz.

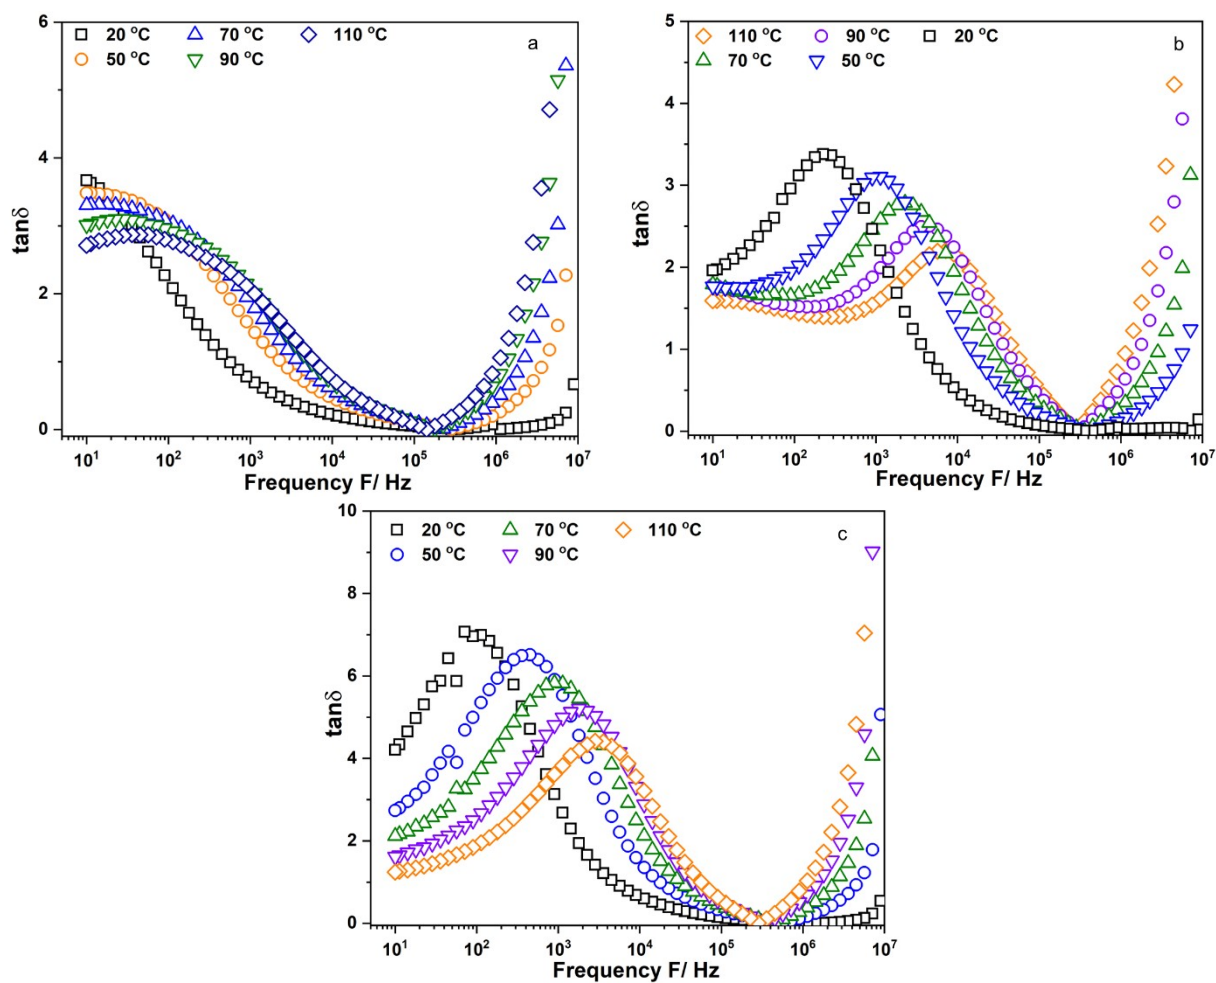

Figure S5: Frequency dependent of the loss factor,  $\tan\delta$ , of (a)  $\text{Li}_{5.96}\text{Ca}_{0.002}\text{PS}_5\text{Cl}$ ; (b)  $\text{Li}_{5.9}\text{Ca}_{0.05}\text{PS}_5\text{Cl}$  and (c)  $\text{Li}_{5.8}\text{Ca}_{0.1}\text{PS}_5\text{Cl}$  measured from 10 Hz to 9 MHz.

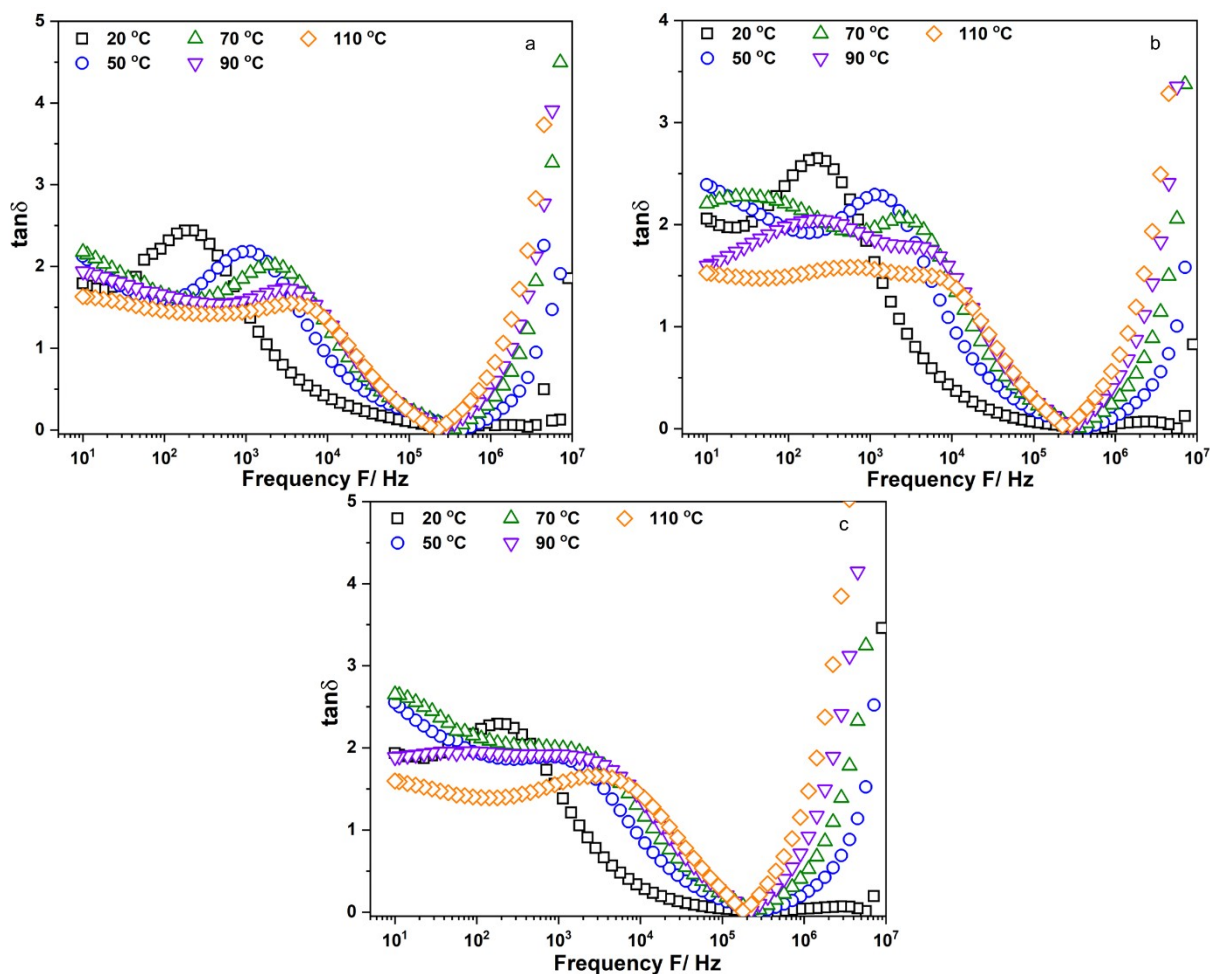

Figure S6: Frequency dependent of the loss factor,  $\tan\delta$ , of (a)  $\text{Li}_{5.94}\text{Ba}_{0.03}\text{PS}_5\text{Cl}$ ; (b)  $\text{Li}_{5.94}\text{Zn}_{0.03}\text{PS}_5\text{Cl}$  and (c)  $\text{Li}_{5.94}\text{Y}_{0.02}\text{PS}_5\text{Cl}$  measured from 10 Hz to 9 MHz.
